# Supplementary material for: Differential Effects of n-3 and n-6 Polyunsaturated Fatty Acids on Placental and Embryonic Growth and Development in Diabetic Pregnant Mice
Source: MDPI journal article supplement (doi:10.3390/nu16081182), 2024-04-16

## Supplementary Figure

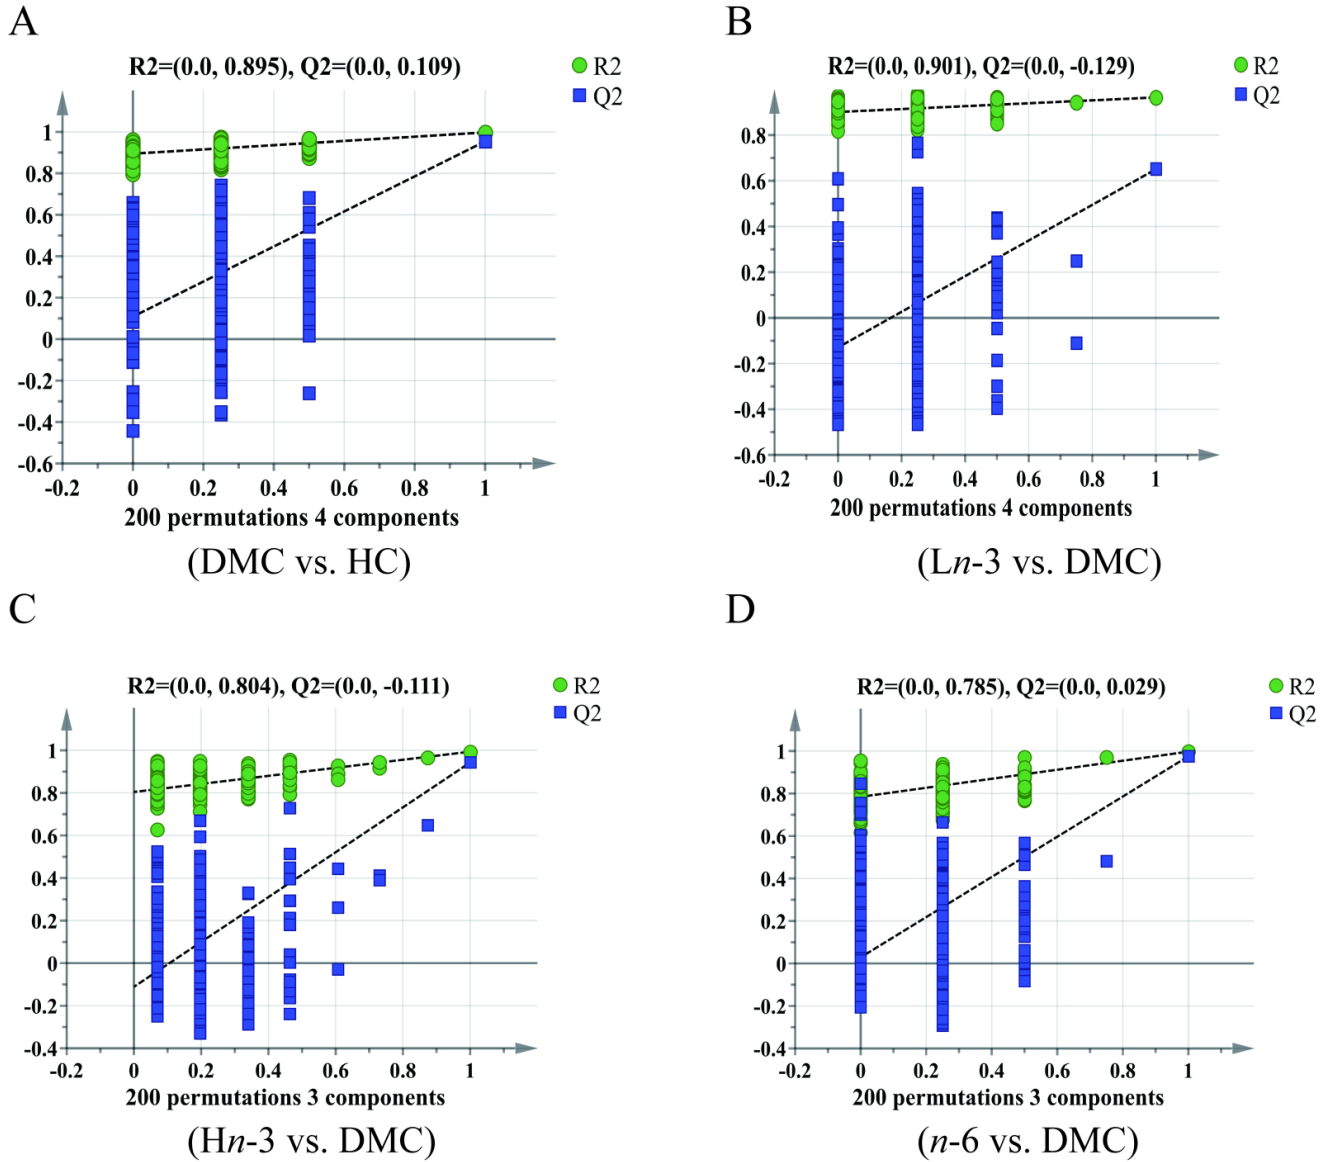

**Figure S1.** Permutation tests for pairwise PLS-DA between DMC and HC (A),  $Ln-3$  (B),  $Hn-3$  (C) and  $n-6$  (D). All  $R^2Y$  and  $Q^2Y$  values were smaller than that in the actual model (generated by PLS-DA model). These results showed that the PLS-DA model had good predictive power without over-fitting. HC, healthy mice + normal diet (AIN-93G); DMC, diabetic mice + normal diet;  $Ln-3$ , diabetes + diet of low-dose  $n-3$  PUFA;  $Hn-3$ , diabetes + diet of high-dose  $n-3$  PUFA;  $n-6$ , diabetes + diet of  $n-6$  PUFA.

## Raw bands for western blotting analysis

Group: HC, healthy mice + normal diet (AIN-93G); DMC, diabetic mice + normal diet; *Ln-3*, diabetes + diet of low-dose *n-3* PUFA; *Hn-3*, diabetes + diet of high-dose *n-3* PUFA; *n-6*, diabetes + diet of *n-6* PUFA

VEGF: 40 KDa; PGF: 25 KDa; IGF-1: 13 KDa; IGFBP3: 29 KDa and 46 KDa

### VEGF

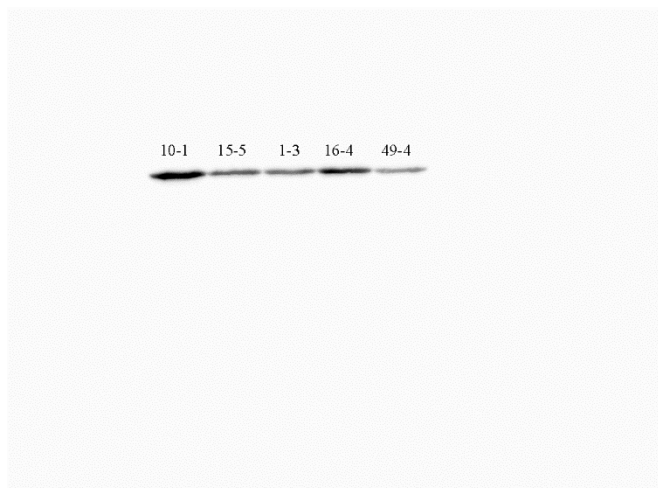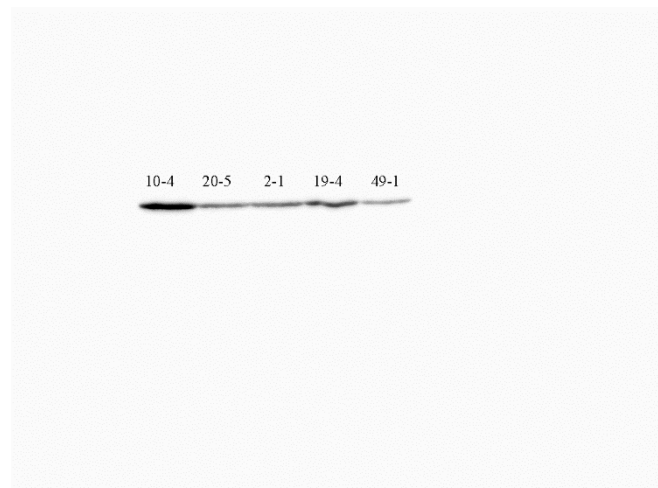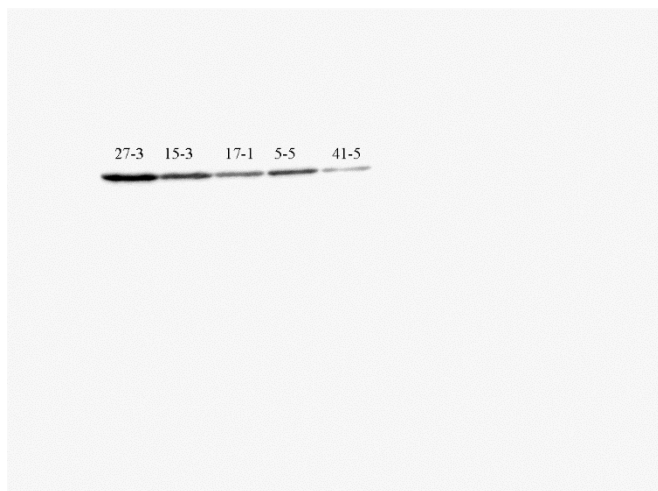

PGF

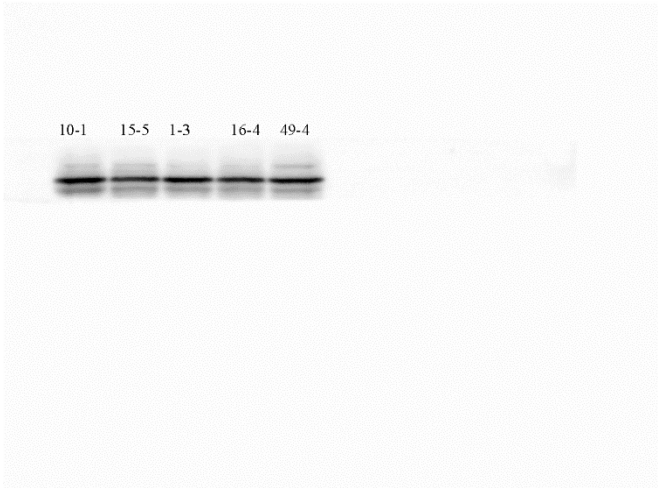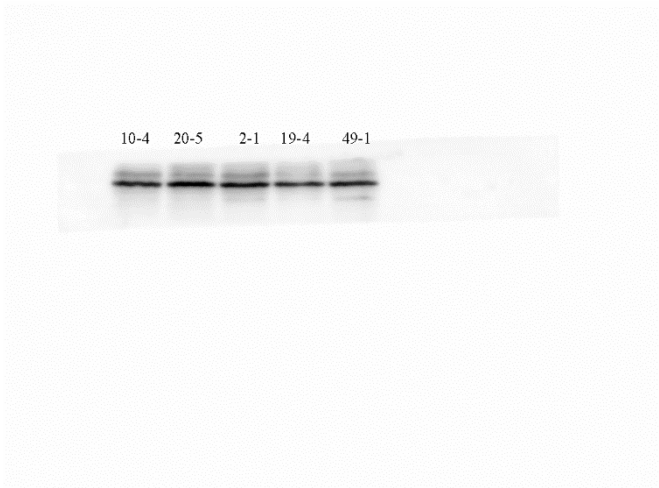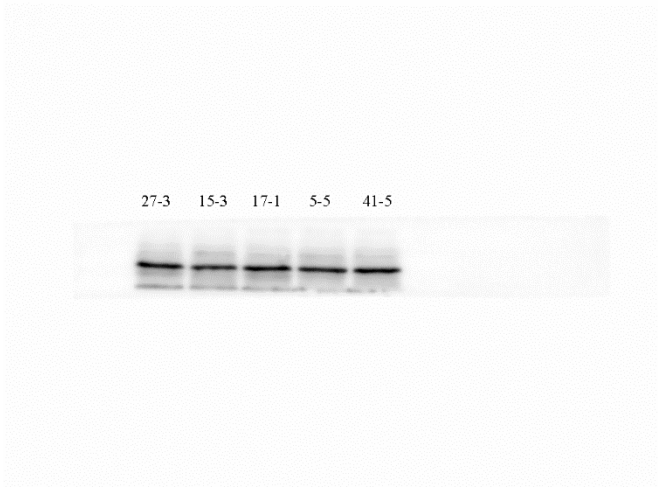

IGF-1

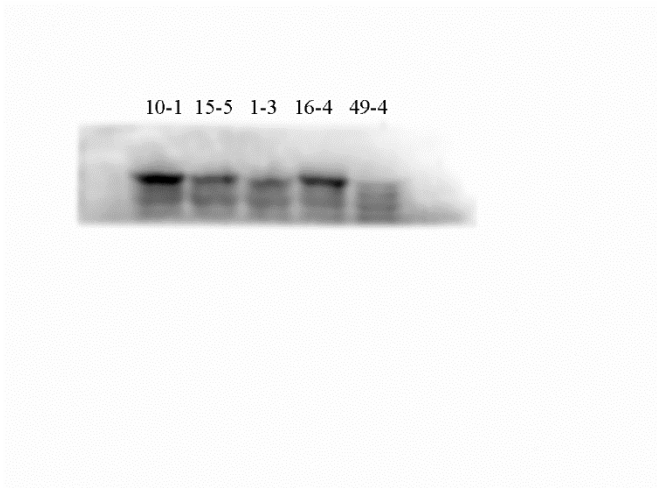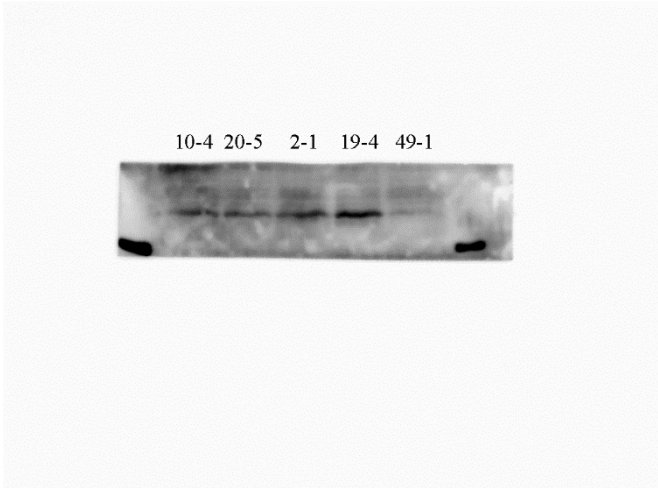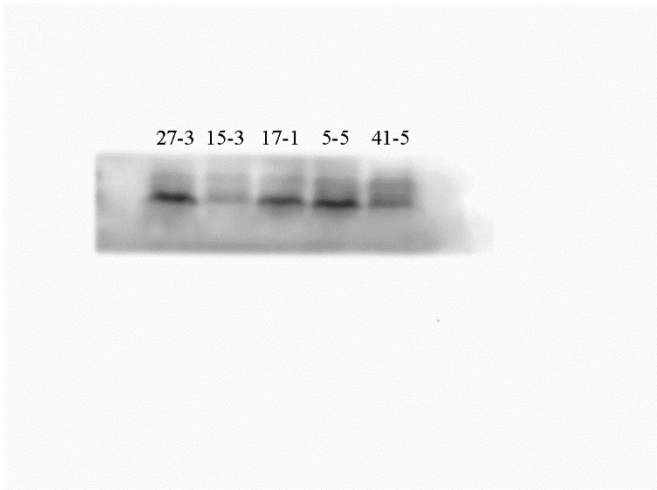

IGFBP3

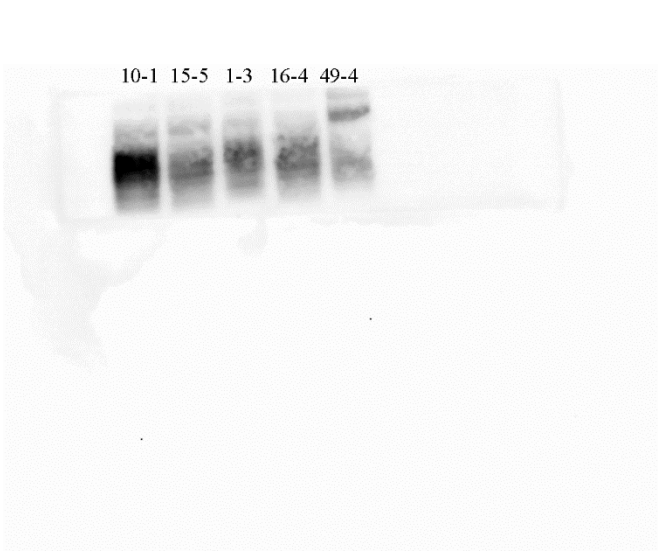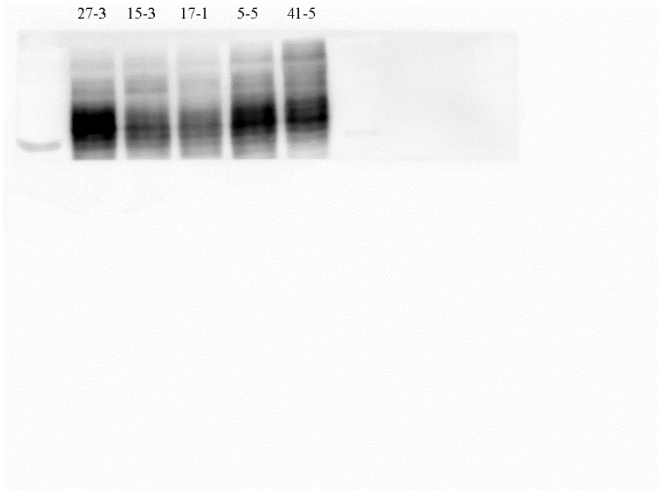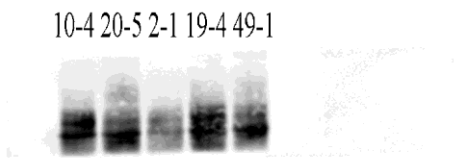

β-actin

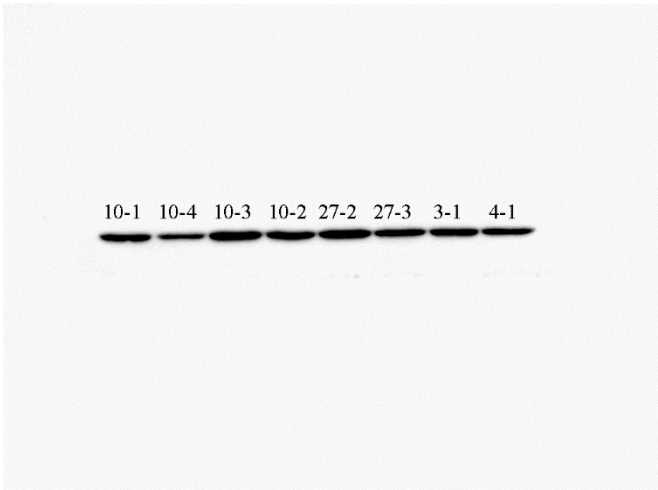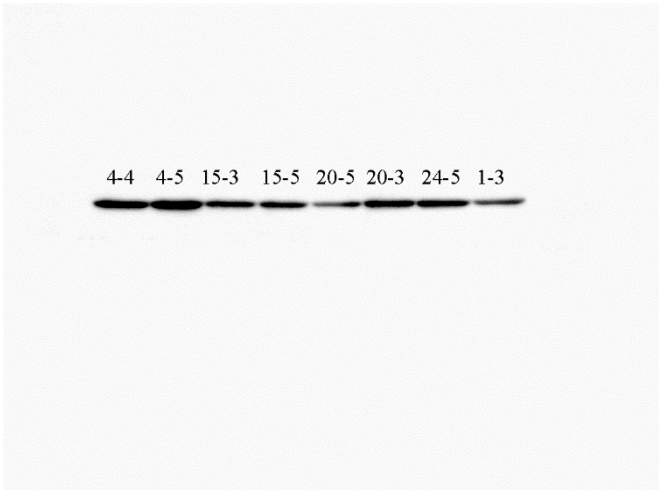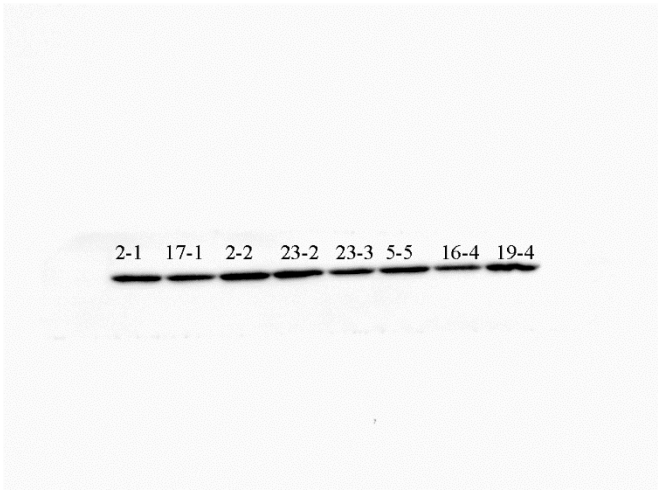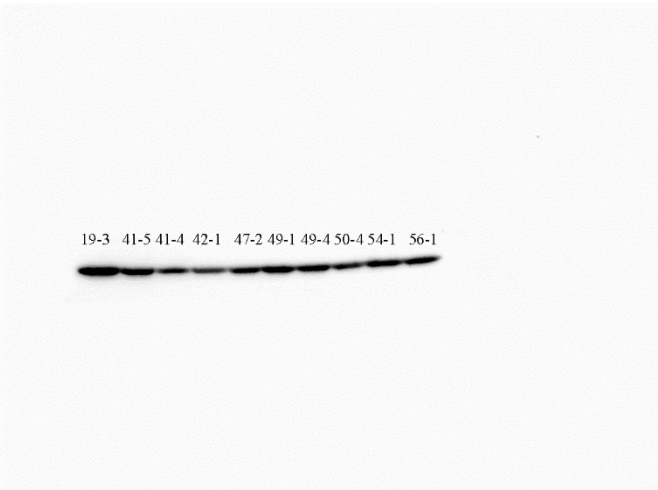

Supplement: s1 [file s1]
